# Supplementary material
Source: HighWire-hosted journal article supplement (http://jpet.aspetjournals.org/highwire/filestream/138310/field_highwire_adjunct_files/0/235184Supplemental_Figures.pdf)
Supplement: 235184Supplemental_Figures.pdf [file 235184Supplemental_Figures.pdf]

**Title:** Long-term reduction of kappa opioid receptor function by norbinaltorphimine in peripheral sensory neurons requires c-Jun N-terminal kinase activity and new protein synthesis.

**Authors:** Raehannah J. Jamshidi, Laura C. Sullivan, Blaine A. Jacobs, Teresa A. Chavera, Kelly A. Berg and William P. Clarke

**Journal Name:** Journal of Pharmacology and Experimental Therapeutics

### **Supplemental Figure Legends**

**Supplemental Figure 1: Long-term reduction in U50488-mediated inhibition of PGE<sub>2</sub>-stimulated thermal allodynia in the rat hindpaw by norBNI is mediated by activation of JNK.** Rats received intraplantar (i.pl.) injections of the JNK inhibitor, SP600125 (1 µg) or vehicle (Veh) 24 h and 30 min before injection of norBNI (30 ng, i.pl.) or vehicle. Two days (**A**), and 7 days (**B**) after norBNI injection, rats received co-injections of PGE<sub>2</sub> (0.3 µg, i.pl.) with either U50488 (0.1 µg, i.pl.) or vehicle. Paw withdrawal latencies (PWL) in response to a radiant heat stimulus applied to the ventral surface of the hindpaw were measured in duplicate before and at 5 min intervals after the last injection for 20 min. Data are expressed as the change in PWL (sec) from pre-injection baseline and represent the mean ± SEM of six rats per group. Negative values for PWL reflect allodynia (increased sensitivity to the heat stimulus) and positive values reflect antinociception (decreased sensitivity).

**Supplemental Figure 2: Long-term reduction of Sal-A-, but not DPDPE-, mediated inhibition of PGE<sub>2</sub>-stimulated thermal allodynia by norBNI.** Rats were injected with norBNI (30 ng, i.pl.) or

vehicle nine days before co-injection of PGE<sub>2</sub> (0.3 µg, i.pl.) and the selective KOR agonist, Salvinorin-A (Sal-A, 0.1 µg, i.pl.) or two days before co-injection of PGE<sub>2</sub> (0.3 µg, i.pl.) and the selective DOR agonist, DPDPE (20 µg, i.pl.). PWL in response to a radiant heat stimulus applied to the ventral surface of the hindpaw was measured in duplicate before and at 5 min intervals after the last injection. Data are expressed as the change in PWL (in sec) from pre-injection baseline and represent the mean ± SEM of 6 animals.

**Supplemental Figure 3: Dose-response for long-term inhibitory effect of norBNI on U50488-mediated antinociception.** Rats were injected (i.pl.) with the indicated doses of norBNI (0.3, 3, or 30 ng) or vehicle (Veh). Two days later rats received injections (i.pl.) of PGE<sub>2</sub> (0.3 µg) with U50488 (0.1 µg) or vehicle. PWL in response to application of a radiant heat stimulus to the ventral surface of the hindpaw was measured in duplicate before and at 5 min intervals following the last injection. **A)** Data are expressed as the mean ± SEM of the area under the time course curves (AUC) for each group of 6 animals. \*\* P < 0.05, compared to veh/PGE<sub>2</sub>. **B)** Data are expressed as the change in PWL (in sec) from pre-injection baseline and represent the mean ± SEM of 6 animals. The 3 ng dose of norBNI was chosen for the experiment to surmount norBNI occupancy of KOR with U50488 as shown in Figure 3.

**Supplemental Figure 4: Pre-treatment with the KOR agonist, U50488, blocked the long-term inhibitory effect of norBNI.** Rats received injections (i.pl.) of vehicle, U50488 (100 µg, 10,000xK<sub>i</sub>), norBNI (3 ng, 100xK<sub>i</sub>), or U50488 (100 µg) with norBNI (3 ng). Two (**A**) and seven (**B**) days later, U50488-mediated inhibition of PGE<sub>2</sub>-stimulated thermal allodynia was measured. Rats received co-injections (i.pl.) of PGE<sub>2</sub> (0.3 µg) with U50488 (0.1 µg). PWL in response to application of a radiant heat stimulus to the ventral surface of the hindpaw was measured in duplicate before and at 5 min intervals

following the co-injection of PGE<sub>2</sub> plus U50488. Data are expressed as the change in PWL (in sec) from pre-injection baseline and represent the mean ± SEM of 6 animals.

**Supplemental Figure 5: Long term reduction of U50488-mediated inhibition of PGE<sub>2</sub>-stimulated thermal allodynia by norBNI is peripherally mediated.** Rats received injections (i.pl.) of norBNI (30 ng) or vehicle (Veh). Two **(A)** and seven **(B)** days later, Rats received co-injections (i.pl.) of PGE<sub>2</sub> (0.3 µg) with U50488 (0.1 µg) in either the contralateral or the ipsilateral hindpaw. PWL in response to application of a radiant heat stimulus to the ventral surface of the hindpaw was measured in duplicate before and at 5 min intervals following the co-injection of PGE<sub>2</sub> plus U50488. Data are expressed as the change in PWL (in sec) from pre-injection baseline and represent the mean ± SEM of 6 animals.

**Supplemental Figure 6: Washout of norBNI from cultures of peripheral sensory neurons.** Cells were pre-treated with norBNI (3 nM) or vehicle for 15 min and washed thoroughly for 30 min. Then cells were treated with norBNI (3 nM) or vehicle with PGE<sub>2</sub> (1 µM) and U50488 (100 nM) for 15 min before measuring cAMP levels. Data are expressed as the percentage of PGE<sub>2</sub>-stimulated cAMP levels and represent the mean ± SEM of four experiments. Data were analyzed with one-way ANOVA followed by Dunnett's post hoc test. \*\*\**P* < 0.001 compared with vehicle pre-treated cells.

**Supplemental Figure 7: The long-term inhibitory effect of norBNI in vivo is blocked by inhibitors of protein translation.** Rats received injections (i.pl.) of cycloheximide, CHX (25 µg; **A,B**), rapamycin (RAPA, 12 µg; **C,D**) or vehicle 30 min prior to and 24 h following injection (i.pl.) of norBNI (30 ng) or vehicle. Two **(A,C)** and seven days **(B,D)** following norBNI injection, rats received co-injections (i.pl.) of PGE<sub>2</sub> (0.3 µg) with U50488 (0.1 µg) or vehicle. PWL in response to application of a radiant heat stimulus to the ventral surface of the hindpaw was measured in duplicate before and at 5 min intervals

following the last injection. Data are expressed as the change in PW (in sec)L from pre-injection baseline and represent the mean  $\pm$  SEM of 6 animals.

**Supplemental Figure 8: Long-term reduction of U50488-mediated antinociception by norBNI was not blocked by the protein synthesis inhibitor, cycloheximide, given 5-6 days after norBNI injection.** Rats were injected (i.pl.) with norBNI (30 ng) or vehicle (Veh). Five and six days following norBNI administration, rats were injected (i.pl.) with cycloheximide (CHX, 25  $\mu$ g) or vehicle. On day 7, rats were co-injected (i.pl.) with PGE<sub>2</sub> (0.3  $\mu$ g) and U50488 (0.1  $\mu$ g) and PWL in response to a radiant heat stimulus applied to the ventral surface of the hindpaw was measured in duplicate before and every 5 min for 20 min after the last injection. **A)** Data are expressed as the mean  $\pm$  SEM of the area under the time course curves (AUC) for each group of 6 animals and were analyzed with one-way ANOVA and Dunnett's post hoc test. **\*\*** $P < 0.01$  compared with norBNI-vehicle treated rats, **<sup>†</sup>** $P < 0.05$  compared with norBNI-CHX treated rats. **B)** Data are expressed as the change in PWL from pre-injection baseline values and represent the mean  $\pm$  SEM of 6 animals.

**Title:** Long-term reduction of kappa opioid receptor function by norbinaltorphimine in peripheral sensory neurons requires c-Jun N-terminal kinase activity and new protein synthesis.  
**Authors:** Raehannah J. Jamshidi, Laura C. Sullivan, Blaine A. Jacobs, Teresa A. Chavera, Kelly A. Berg and William P. Clarke  
**Journal Name:** Journal of Pharmacology and Experimental Therapeutics

**A**

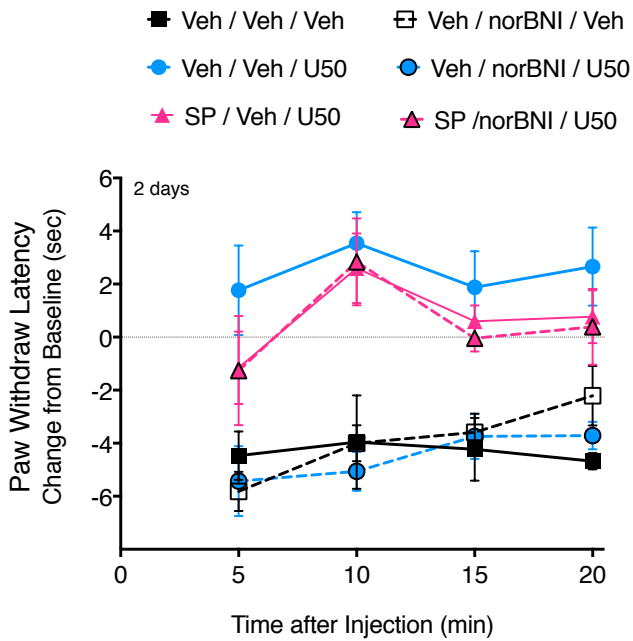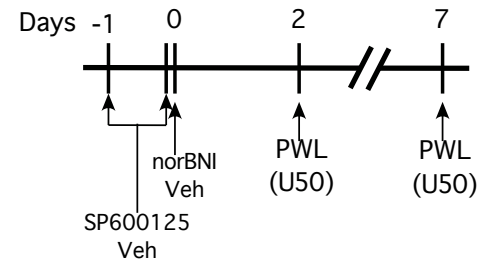

**B**

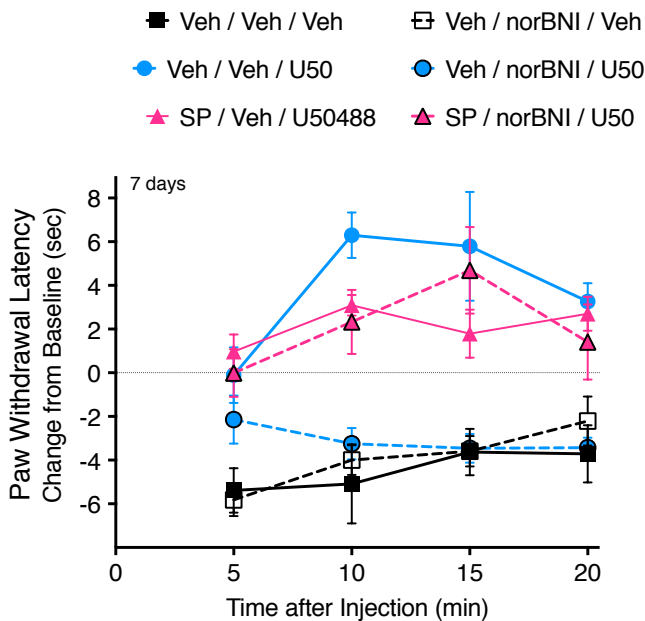

**Supplemental Figure 1**



**Title:** Long-term reduction of kappa opioid receptor function by norbinaltorphimine in peripheral sensory neurons requires c-Jun N-terminal kinase activity and new protein synthesis.  
**Authors:** Raehannah J. Jamshidi, Laura C. Sullivan, Blaine A. Jacobs, Teresa A. Chavera, Kelly A. Berg and William P. Clarke  
**Journal Name:** Journal of Pharmacology and Experimental Therapeutics

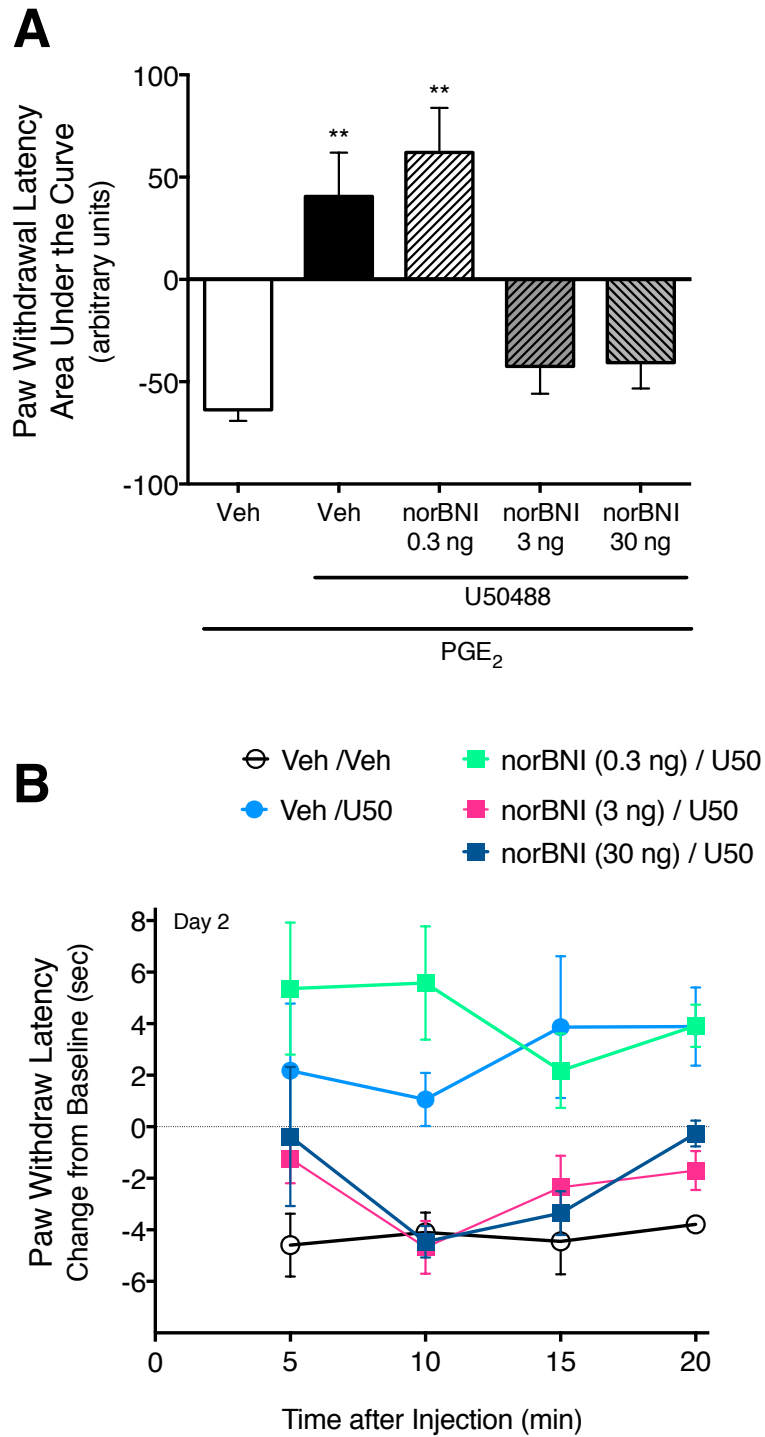

**Supplemental Figure 3**

**Title:** Long-term reduction of kappa opioid receptor function by norbinaltorphimine in peripheral sensory neurons requires c-Jun N-terminal kinase activity and new protein synthesis.  
**Authors:** Raehannah J. Jamshidi, Laura C. Sullivan, Blaine A. Jacobs, Teresa A. Chavera, Kelly A. Berg and William P. Clarke  
**Journal Name:** Journal of Pharmacology and Experimental Therapeutics

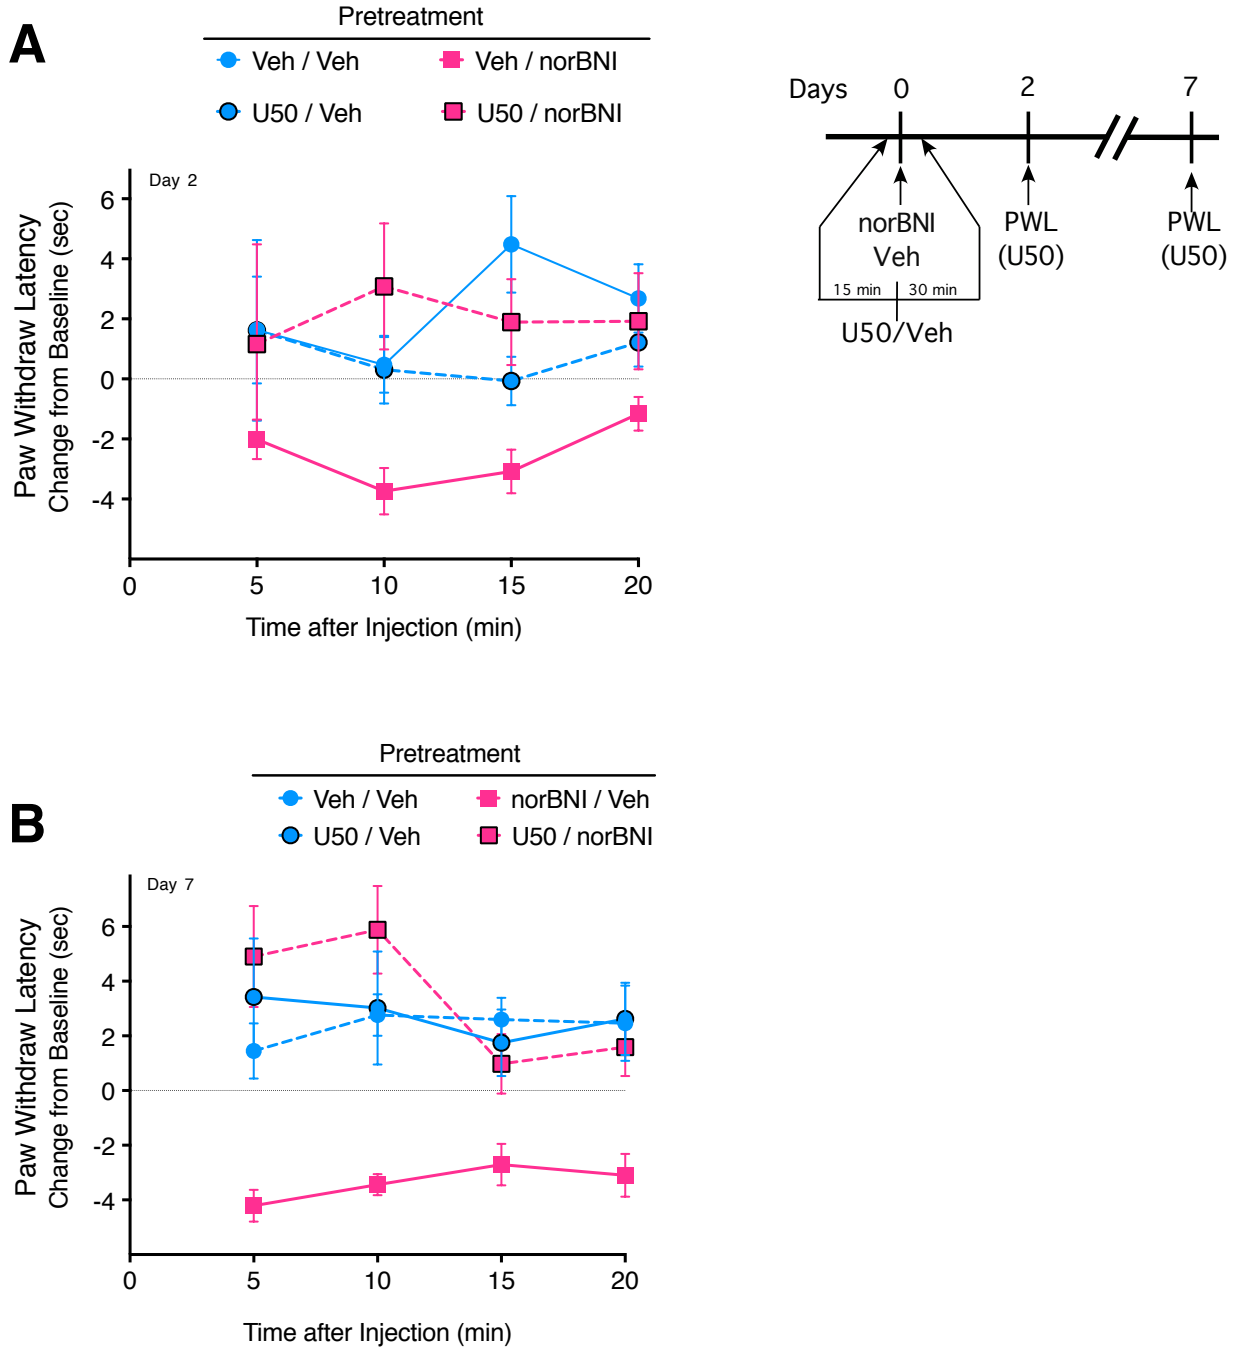

**Supplemental Figure 4**



**Title:** Long-term reduction of kappa opioid receptor function by norbinaltorphimine in peripheral sensory neurons requires c-Jun N-terminal kinase activity and new protein synthesis.  
**Authors:** Raehannah J. Jamshidi, Laura C. Sullivan, Blaine A. Jacobs, Teresa A. Chavera, Kelly A. Berg and William P. Clarke  
**Journal Name:** Journal of Pharmacology and Experimental Therapeutics

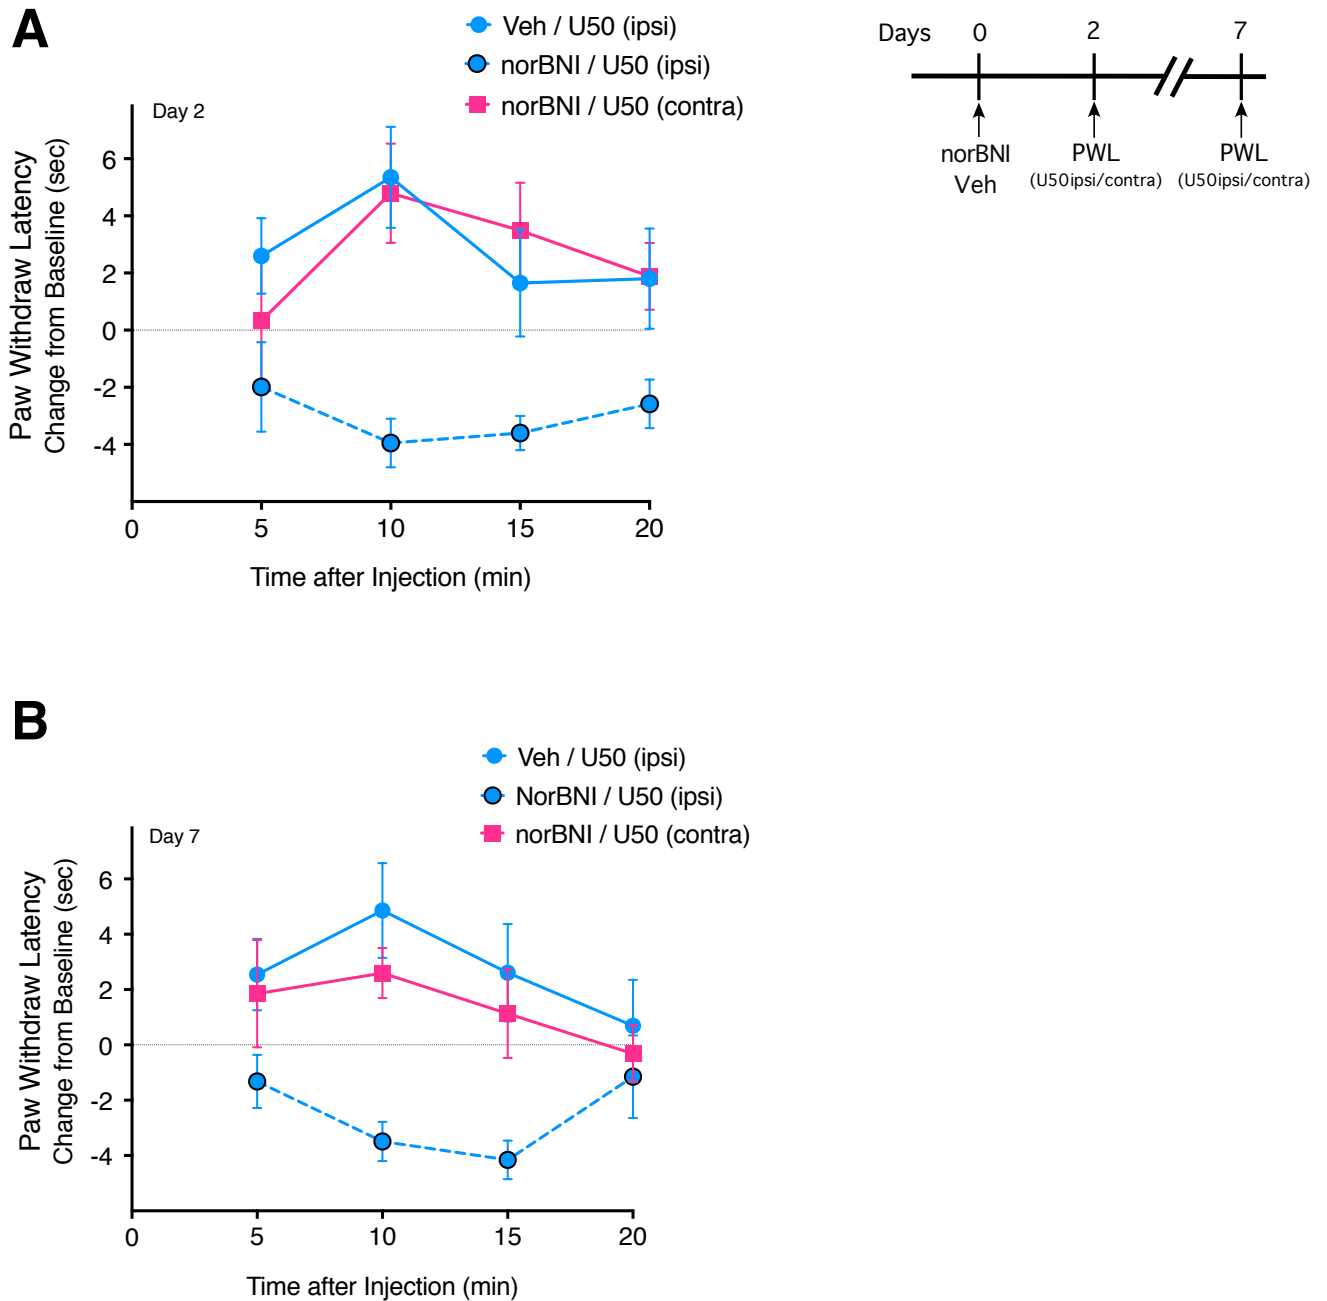

**Supplemental Figure 5**

**Title:** Long-term reduction of kappa opioid receptor function by norbinaltorphimine in peripheral sensory neurons requires c-Jun N-terminal kinase activity and new protein synthesis.

**Authors:** Raehannah J. Jamshidi, Laura C. Sullivan, Blaine A. Jacobs, Teresa A. Chavera, Kelly A. Berg and William P. Clarke

**Journal Name:** Journal of Pharmacology and Experimental Therapeutics

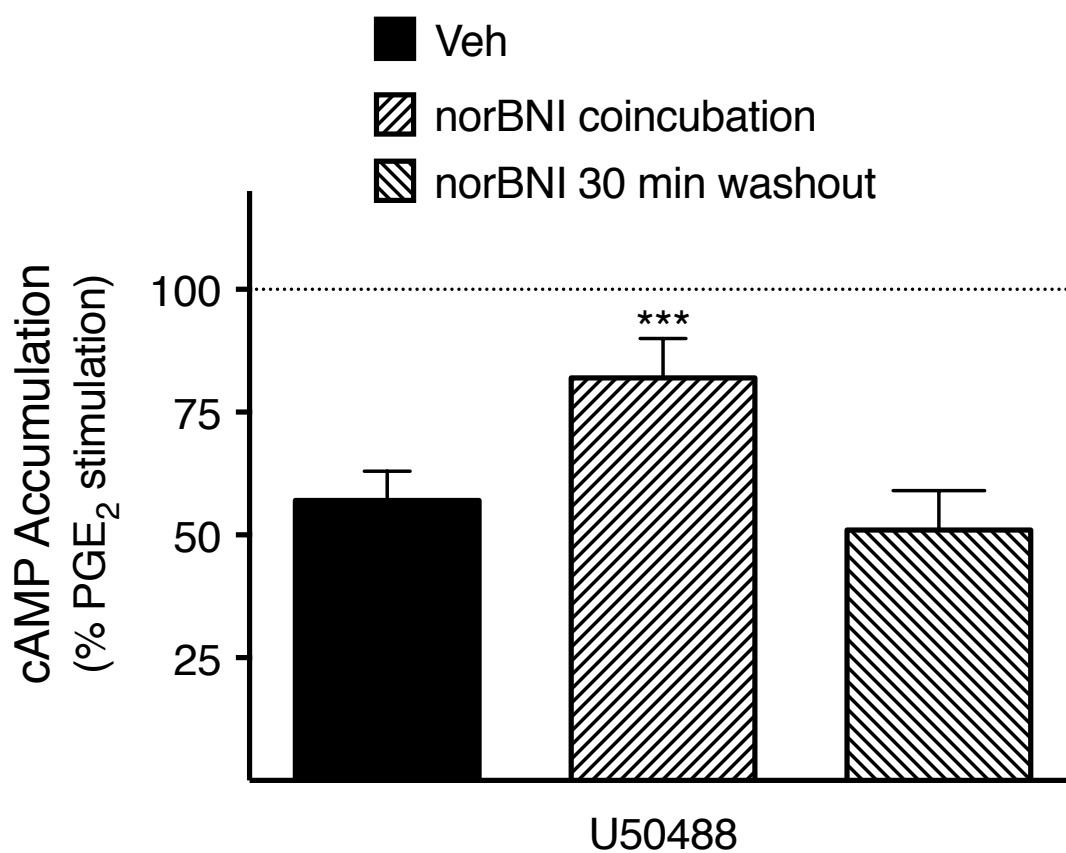

**Supplemental Figure 6**

**Title:** Long-term reduction of kappa opioid receptor function by norbinaltorphimine in peripheral sensory neurons requires c-Jun N-terminal kinase activity and new protein synthesis.

**Authors:** Raehannah J. Jamshidi, Laura C. Sullivan, Blaine A. Jacobs, Teresa A. Chavera, Kelly A. Berg and William P. Clarke

**Journal Name:** Journal of Pharmacology and Experimental Therapeutics

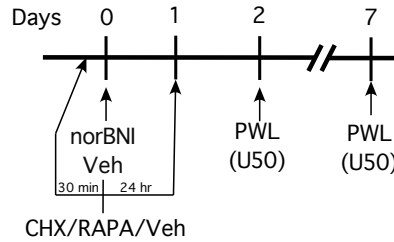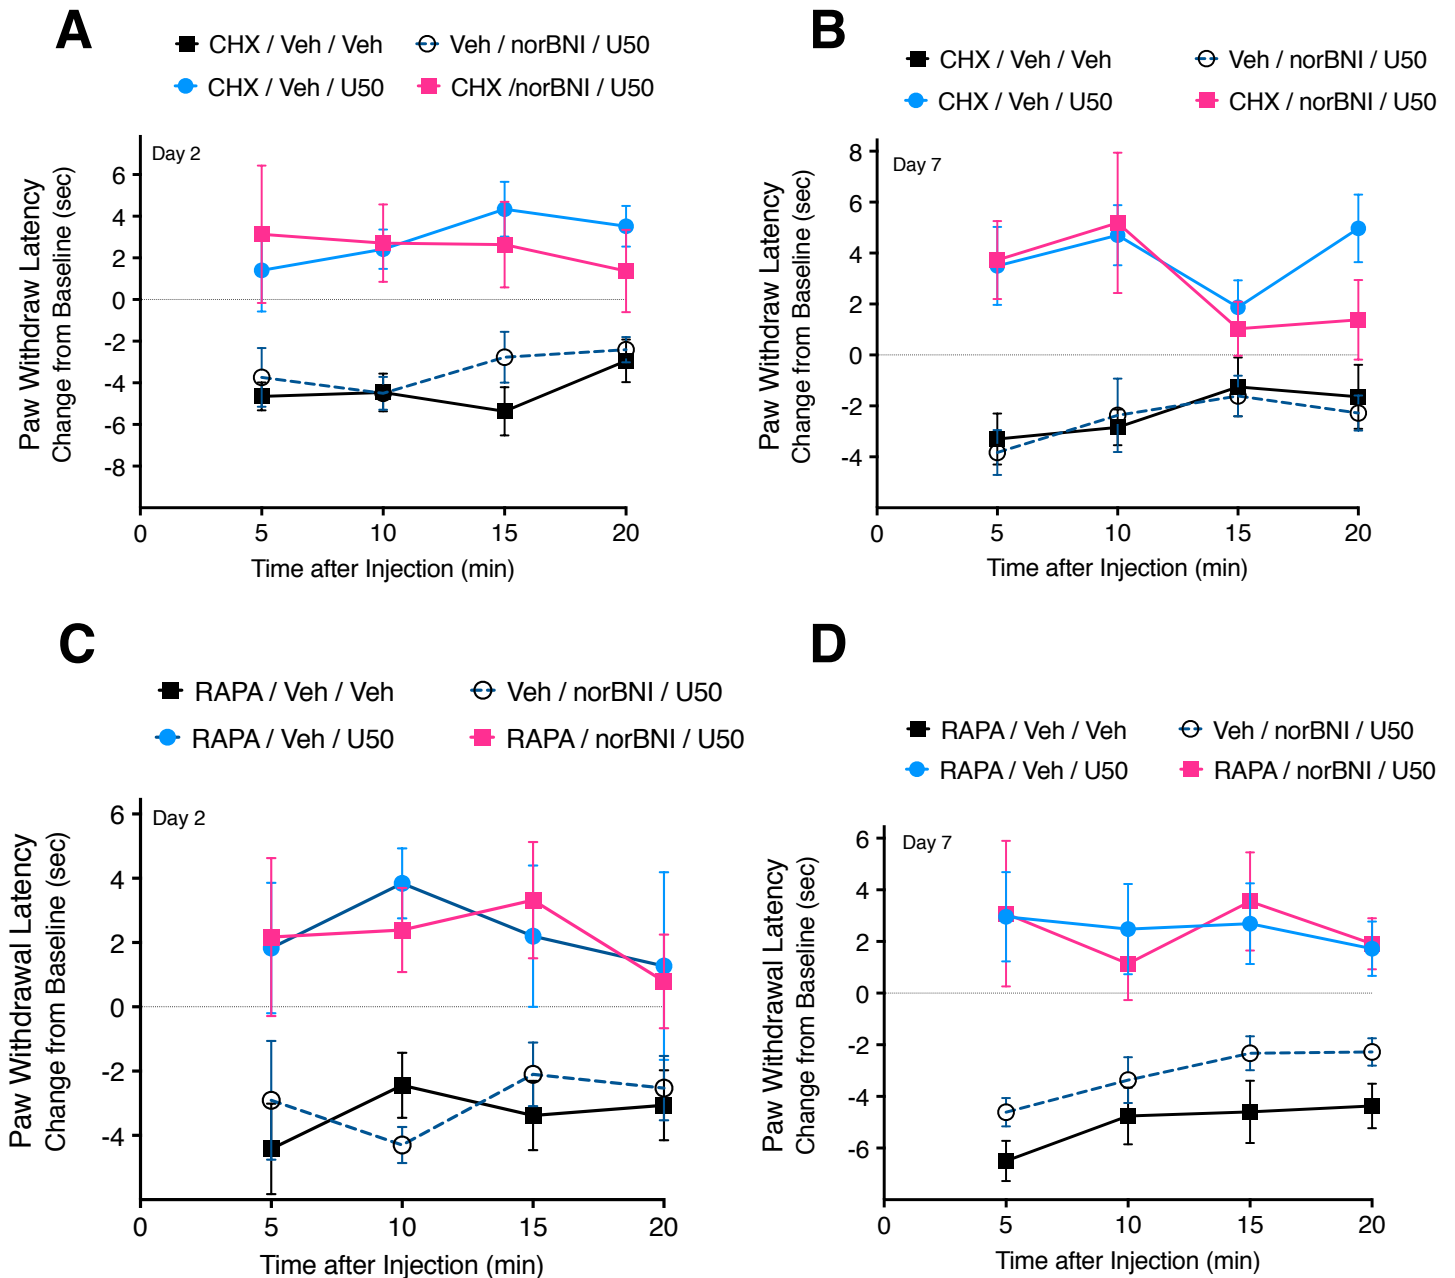

**Supplemental Figure 7**

**Title:** Long-term reduction of kappa opioid receptor function by norbinaltorphimine in peripheral sensory neurons requires c-Jun N-terminal kinase activity and new protein synthesis.

**Authors:** Raehannah J. Jamshidi, Laura C. Sullivan, Blaine A. Jacobs, Teresa A. Chavera, Kelly A. Berg and William P. Clarke

**Journal Name:** Journal of Pharmacology and Experimental Therapeutics

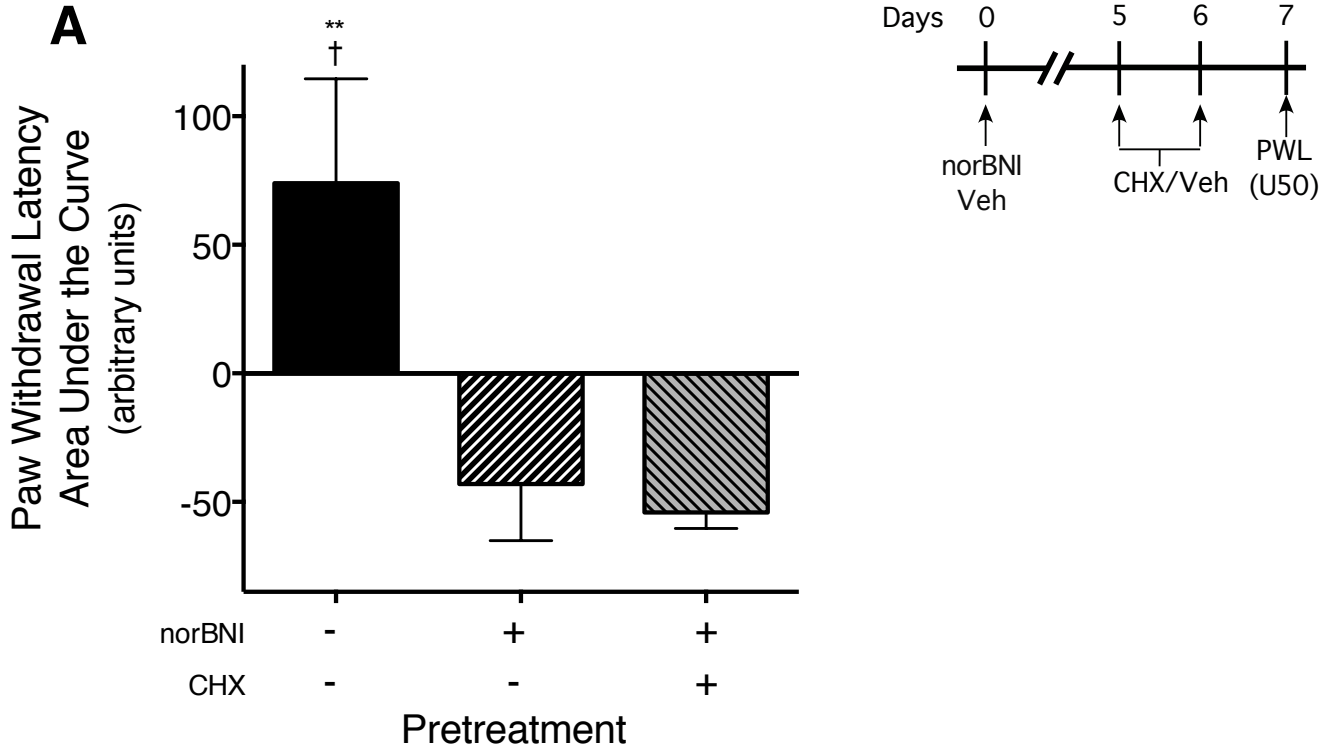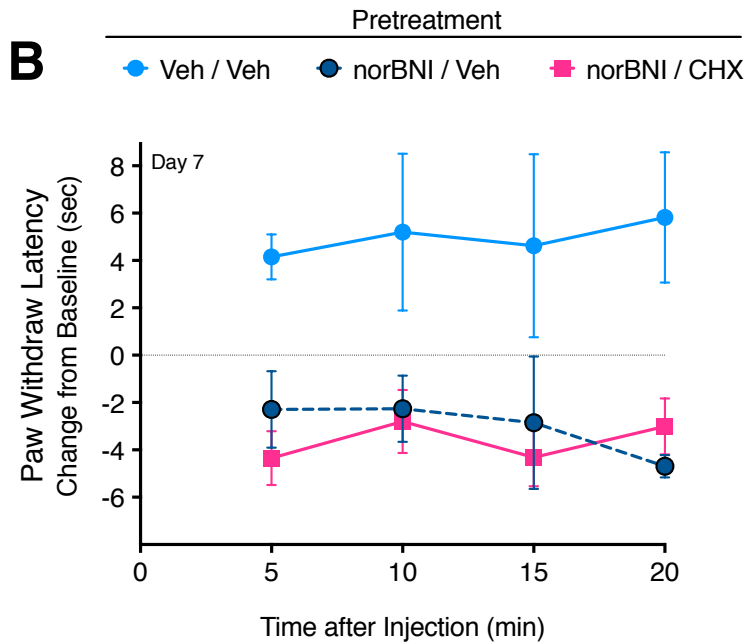

**Supplemental Figure 8**
